## Articles of interest in other COB journals

From *Journal of Cell Science*

### **WASP and SCAR play distinct roles in activating the Arp2/3 complex during myoblast fusion**

Susanne Berger, Gritt Schäfer, Dörthe A. Kesper, Anne Holz, Therese Eriksson, Ruth H. Palmer, Lothar Beck, Christian Klämbt, Renate Renkawitz-Pohl and Susanne-Filiz Önel

Berger, S. et al. 2008. *J. Cell Sci.* doi: 10.1242/jcs.022269

### **Cell-cycle-specific nestin expression coordinates with morphological changes in embryonic cortical neural progenitors**

Takehiko Sunabori, Akinori Tokunaga, Takeharu Nagai, Kazunobu Sawamoto, Masaru Okabe, Atsushi Miyawaki, Yumi Matsuzaki, Takaki Miyata and Hideyuki Okano

Sunabori, T. et al. 2008. *J. Cell Sci.* doi: 10.1242/jcs.025064
